# Supplementary material for: Sisal-like Sn2+doped ZnO hierarchical structures: synthesis, growth mechanism, and their application in photocatalysis
Source: Royal Society of Chemistry journal article supplement (doi:10.1039/d1ce00971k), 2021-01-01
Supplement: d1ce00971k1.pdf [file d1ce00971k1.pdf]

## Supporting Information

# Sisal-like Sn<sup>2+</sup> doped ZnO hierarchical structures: synthesis, growth mechanism, and their application in photocatalysis

Xiaoyu Wang,<sup>a</sup> Jiangang Wei,<sup>a</sup> Yuqin Mao,<sup>a</sup> Wenqin Li,<sup>a</sup> Xiangrong Zhu,<sup>a</sup> Pengwei Wang,<sup>b</sup> and  
LuPing Zhu\*<sup>a</sup>

<sup>a</sup>*School of Energy and Materials, Shanghai Engineering Research Center of Advanced Thermal Functional Materials, Shanghai Polytechnic University, Shanghai 201209, China.*

<sup>b</sup>*School of Resources and Environmental Engineering, Shanghai Polytechnic University, Shanghai 201209, China.*

**Table S1.** The Brunauer–Emmett–Teller (BET) surface area and pore volumes.

| Sample | BET surf areas                    | Pore volumes                       |
|--------|-----------------------------------|------------------------------------|
|        | [m <sup>2</sup> g <sup>-1</sup> ] | [cm <sup>3</sup> g <sup>-1</sup> ] |
| ZnO    | 0.50793                           | 0.0036486                          |
| ZS2    | 0.81348                           | 0.012059                           |
| ZS4    | 1.3467                            | 0.010339                           |
| ZS6    | 2.3275                            | 0.022461                           |
| ZS8    | 1.5473                            | 0.012352                           |
| ZS10   | 1.472                             | 0.010761                           |

\* Corresponding author.

*E-mail addresses:* E-mail: lpzhu@sspu.edu.cn (L.P. Zhu)

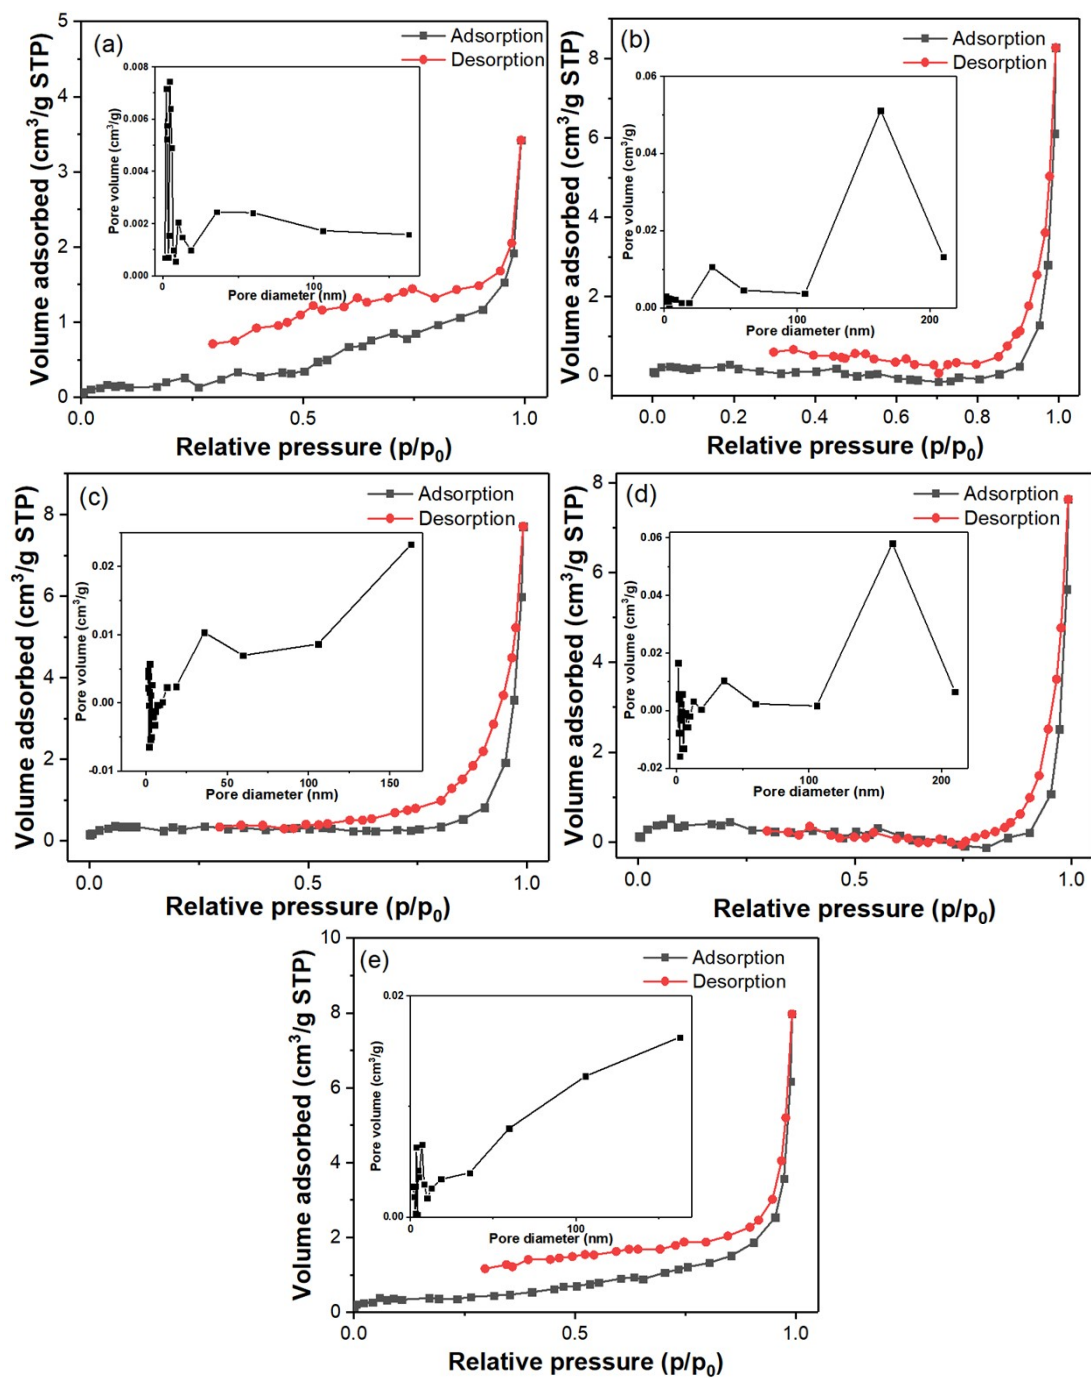

**Fig. S1.** Typical N<sub>2</sub> gas adsorption-desorption isotherm of the ZnO products at 90°C (a) ZnO, (b) ZS2, (c) ZS4, (d) ZS8, (e) ZS10. Inset: the corresponding pore-size distribution.

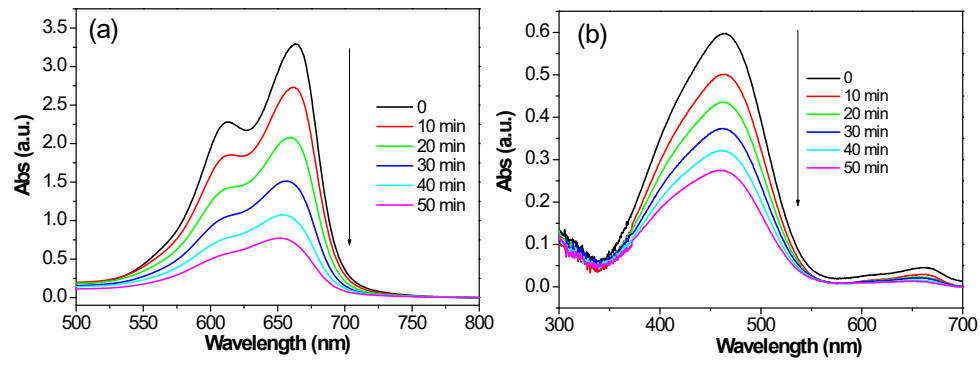

**Fig.**  
**S2.**  
The

absorption spectra of MB (a) and MO (b) solution in the presence of the ZS6 samples at various durations.

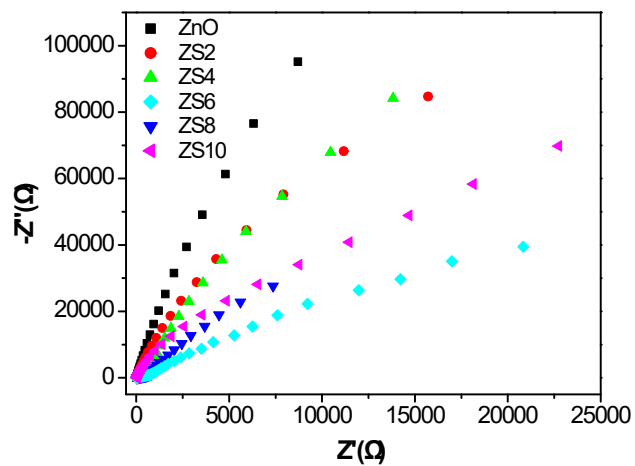

**Fig. S3.** EIS Nyquist plots of the as-synthesized pure ZnO and Sn doped ZnO samples.

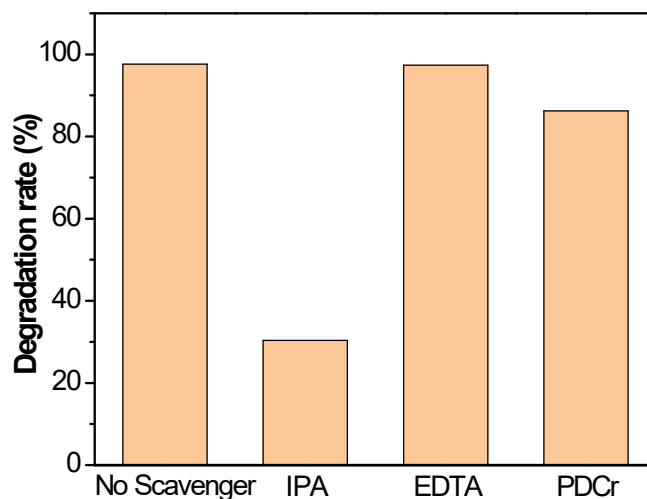

**Fig. S4.** trapping of active species during photocatalytic degradation experiment of RhB over the ZS6 samples under light irradiation after 50 min
